# Supplementary material for: Family Help With Medication Management: A Predictive Marker for Early Readmission
Source: PubMed Central journal article supplement — Mayo Clin Proc Innov Qual Outcomes. 2017 Dec 1;1(3):211–8. doi: 10.1016/j.mayocpiqo.2017.10.004 (PMC6132200; doi:10.1016/j.mayocpiqo.2017.10.004), 2017-12-01
Supplement: mmc1.pdf [file mmc1.pdf]

**Supplementary Appendix S1.** Probability Modeling Equations. Equations used to model the effects of various factors on readmission.

We modeled the impact of these factors to predict risk of 30-day readmission with the following equation:

$$p = \frac{e^{-2.866+(0.465x_1+0.725x_2+0.691x_3+0.079x_4)}}{1 - e^{-2.866+(0.465x_1+0.725x_2+0.691x_3+0.079x_4)}}$$

Where,

$p$ = probability of readmission within 30 days (ROC 0.68)

$x_1$ = Charlson score >3

$x_2$ = Heart failure diagnosis ‘yes’

$x_3$ = Patient not handling medications (family handles all)

$x_4$ = 3 or more admissions in 12 months prior index admission

We modeled the impact of these factors to predict risk of 6-month readmission with the following equation:

$$p = \frac{e^{-2.97+(0.30x_1+0.53x_2)+0.60x_3+1.25x_4+0.55x_5}}{1 - e^{-2.97+(0.30x_1+0.53x_2)+0.60x_3+1.25x_4+0.55x_5}}$$

Where,

$p$  = probability of readmission within 6 months (ROC 0.69)

$x_1$  = Charlson score >3

$x_2$  = Heart failure diagnosis 'yes'

$x_3$  = Patient not handling medications (family handles all)

$x_4$  = 3 or more admissions in prev 12 months prior to index admission

$x_5$  = more than 7 prescriptions
